# Supplementary figures and images for: The terminology of social emergency medicine: Measuring social determinants of health, social risk, and social need
Source: PubMed Central journal article supplement — J Am Coll Emerg Physicians Open. 2020 Jul 20;1(5):852–6. doi: 10.1002/emp2.12191 (PMC7593464; doi:10.1002/emp2.12191), 2020-07-20

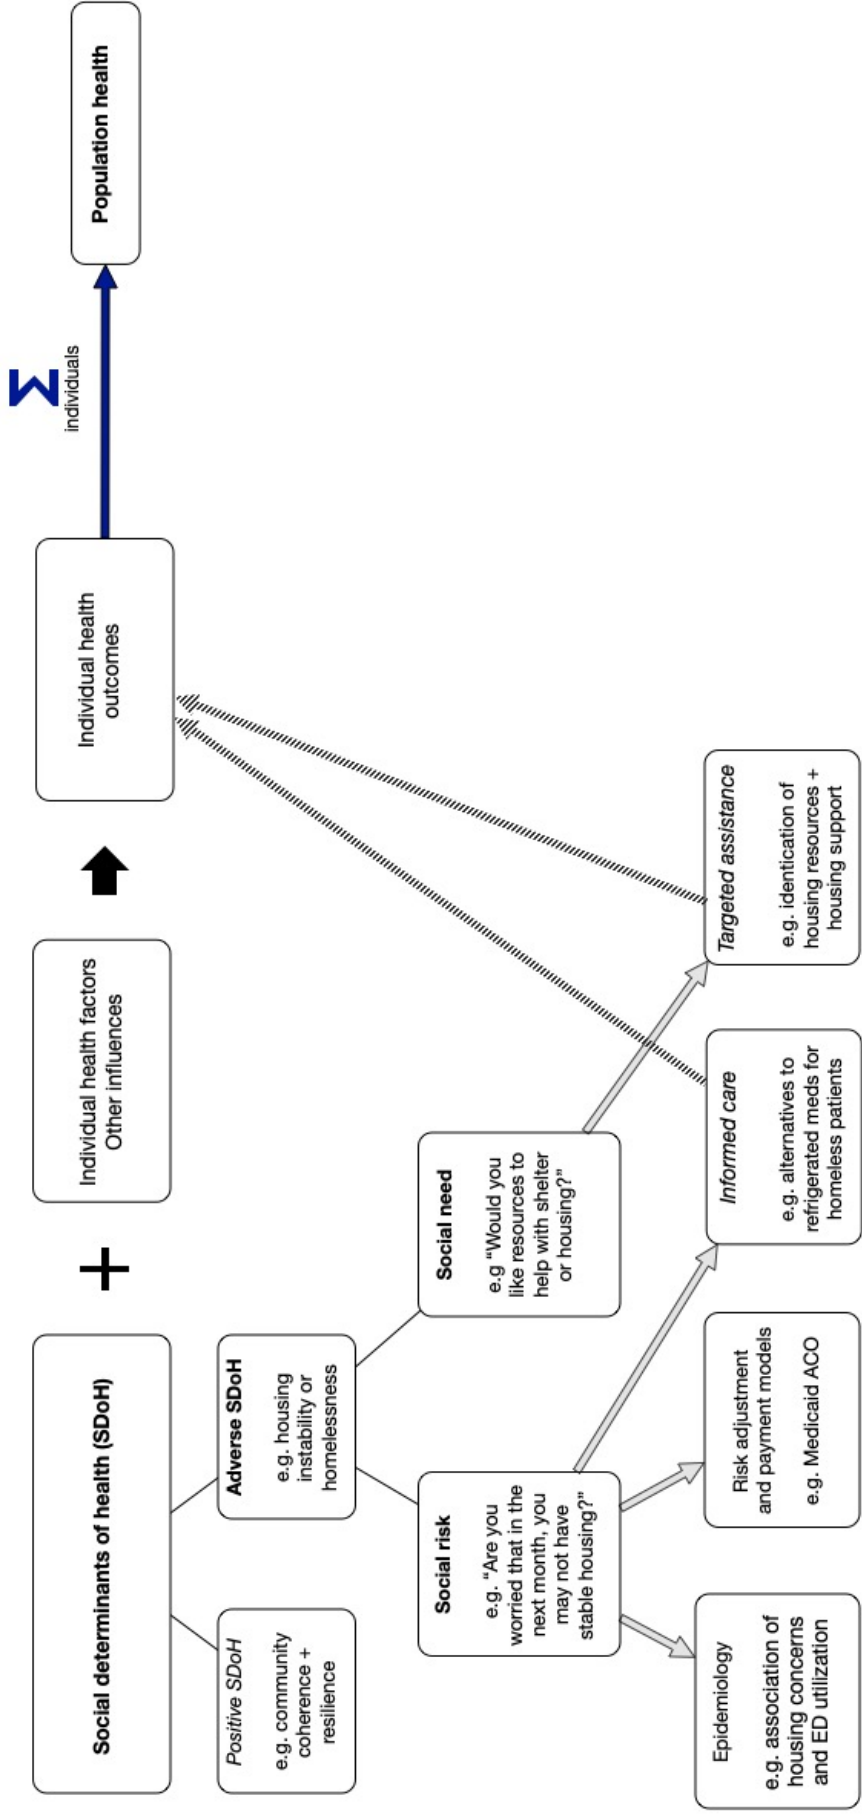

Supplement: EMP2-1-852-s001.pdf [file EMP2-1-852-s001.pdf]

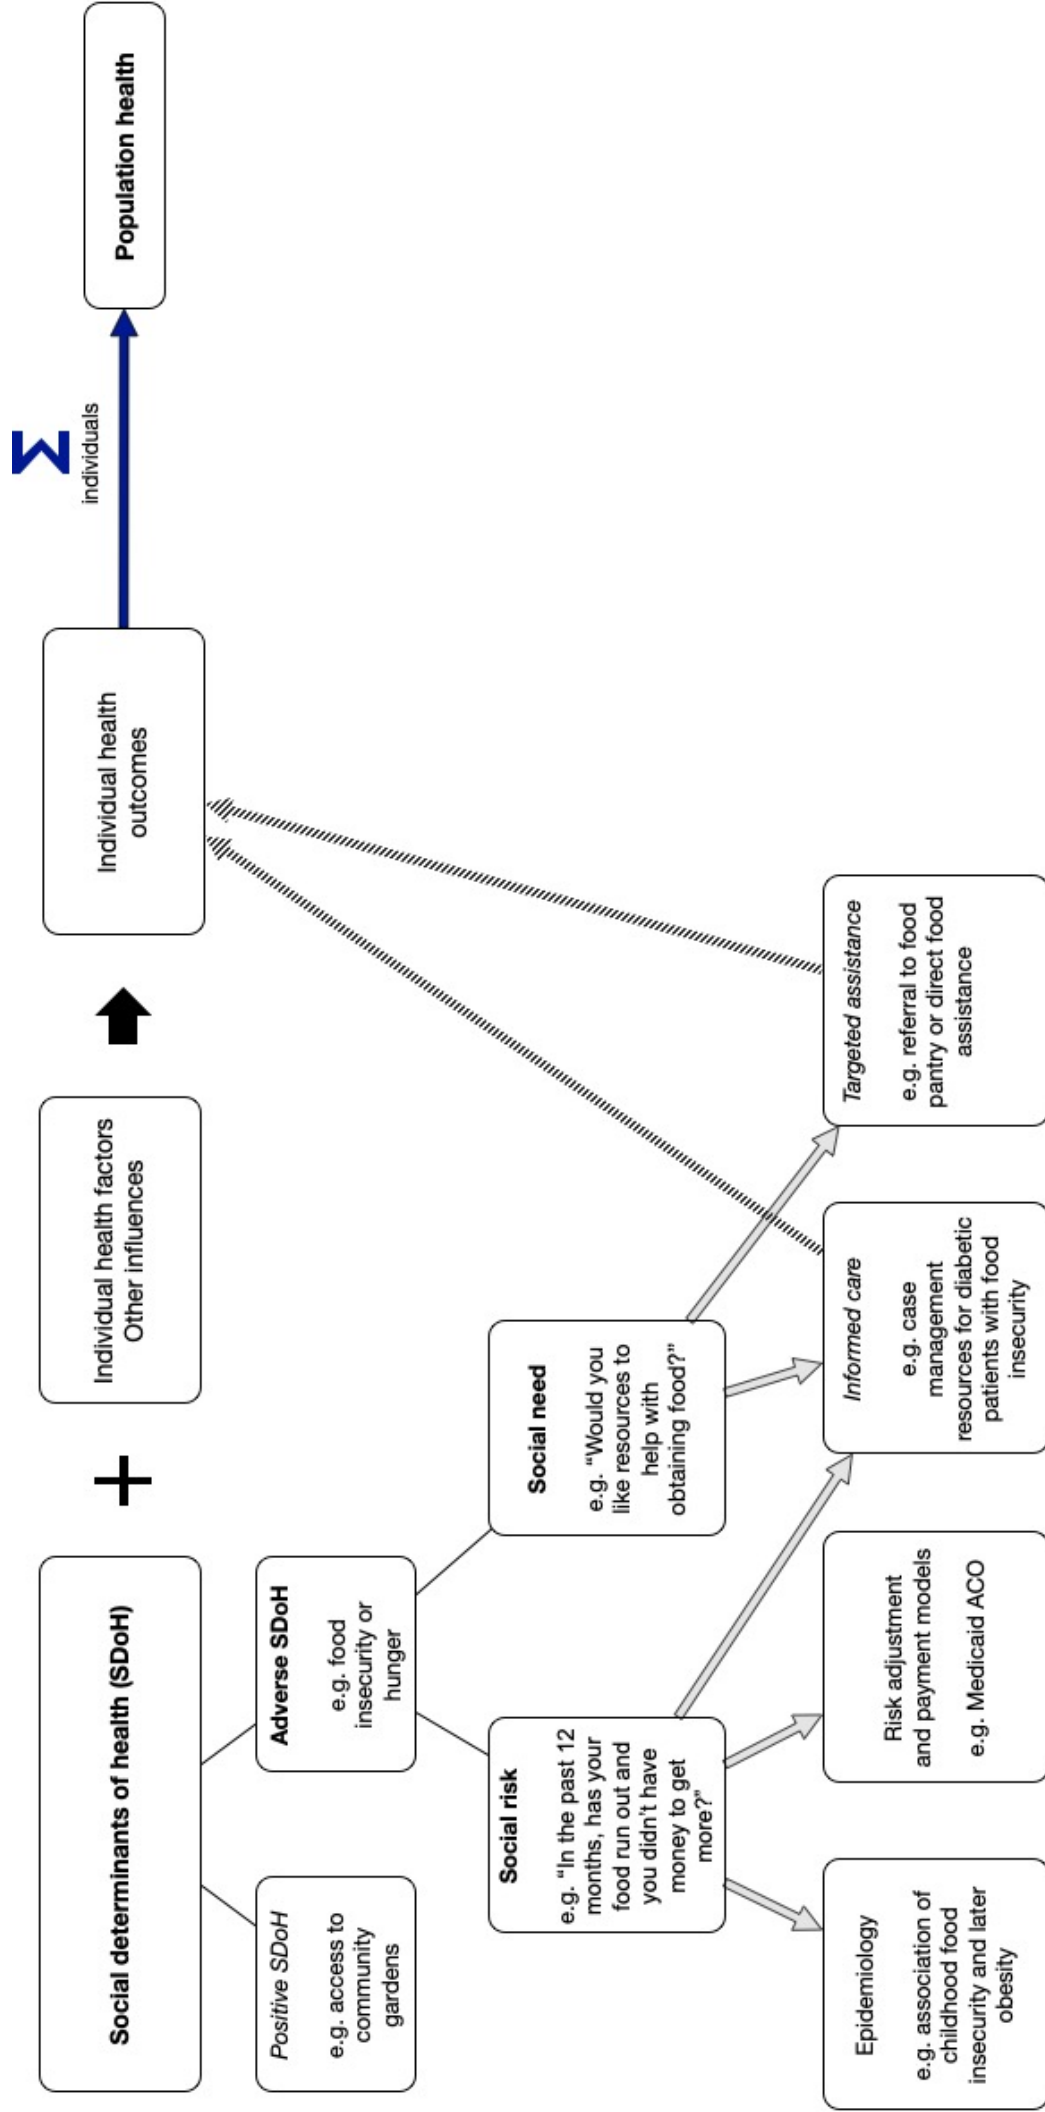

Supplement: EMP2-1-852-s002.pdf [file EMP2-1-852-s002.pdf]

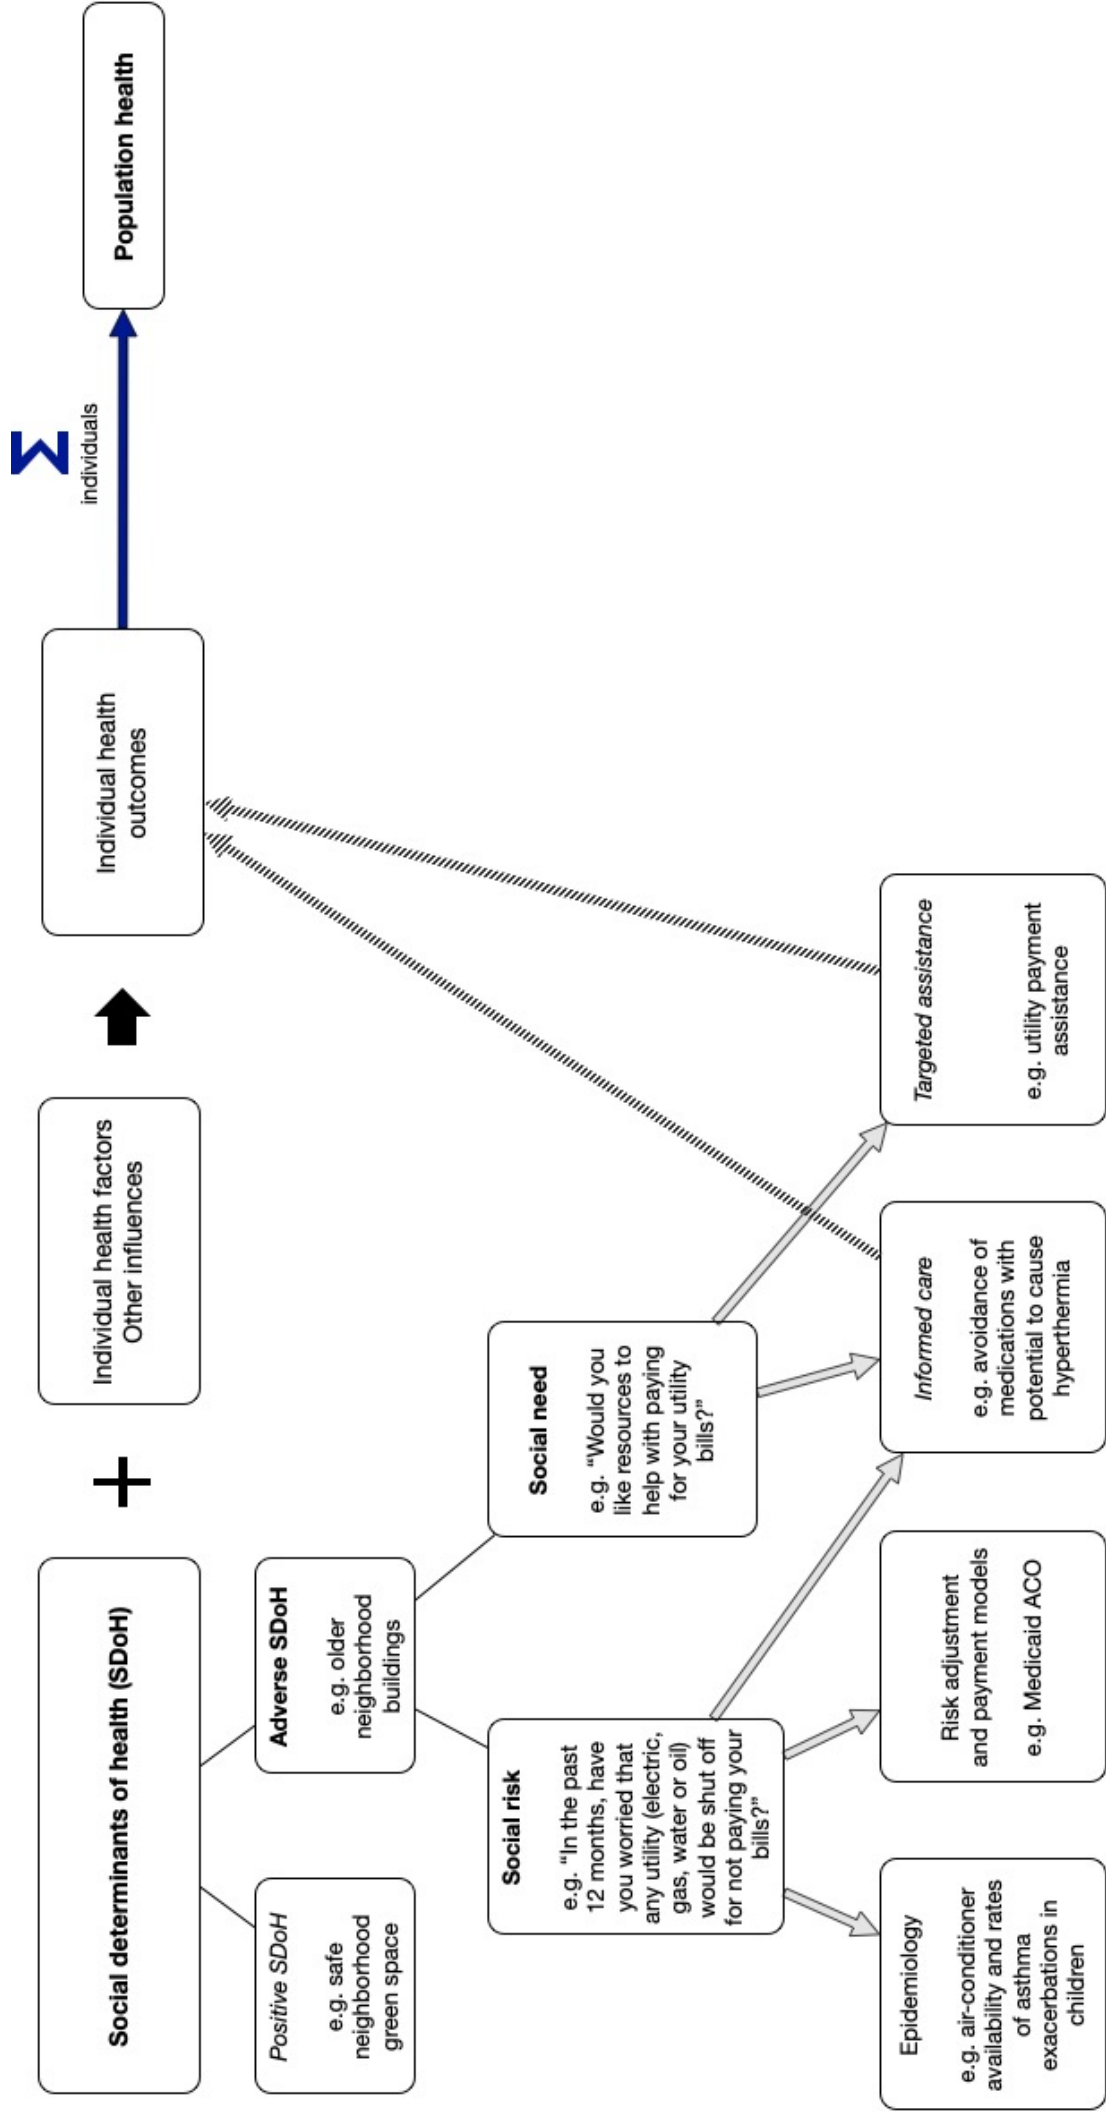

Supplement: EMP2-1-852-s003.pdf [file EMP2-1-852-s003.pdf]

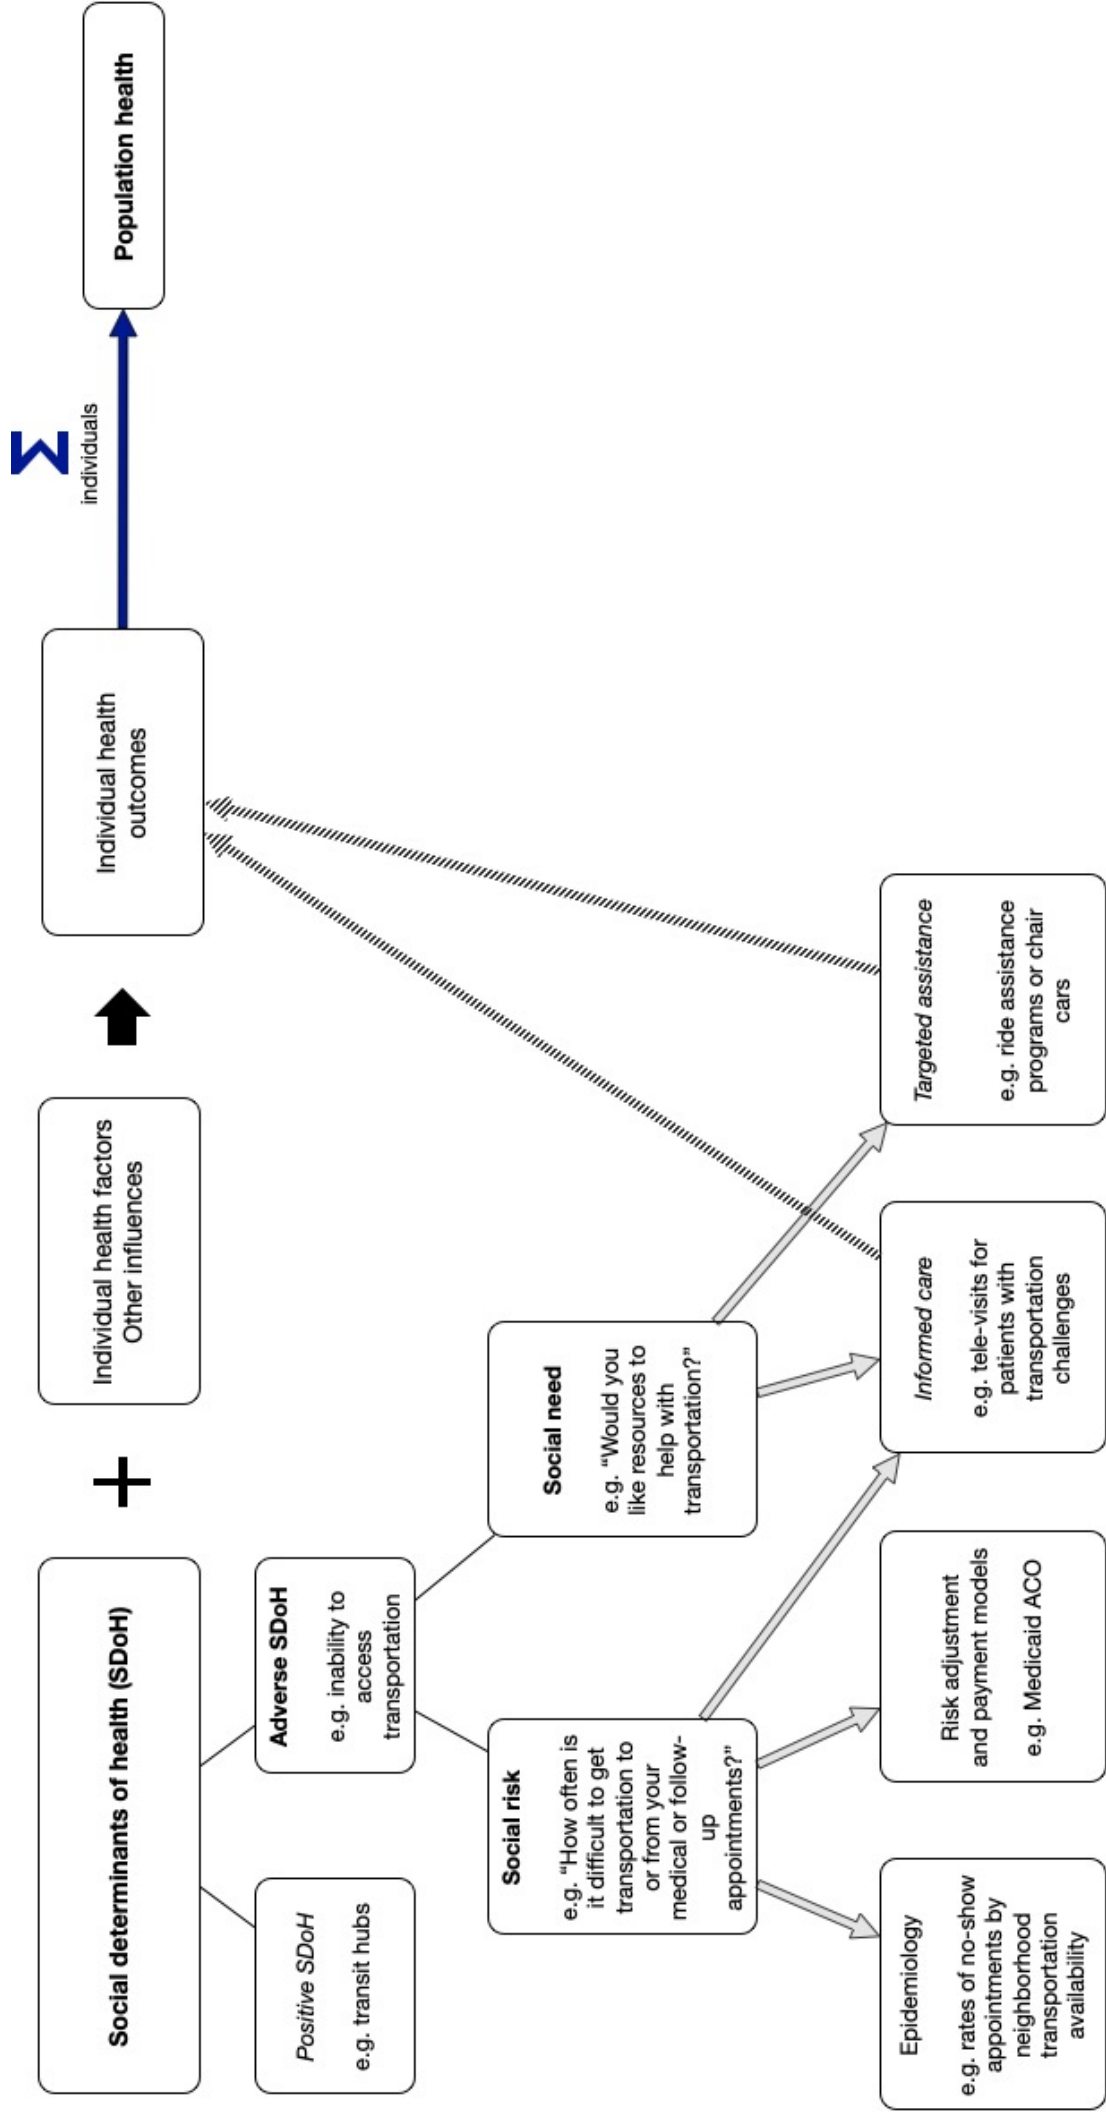

Supplement: EMP2-1-852-s004.pdf [file EMP2-1-852-s004.pdf]

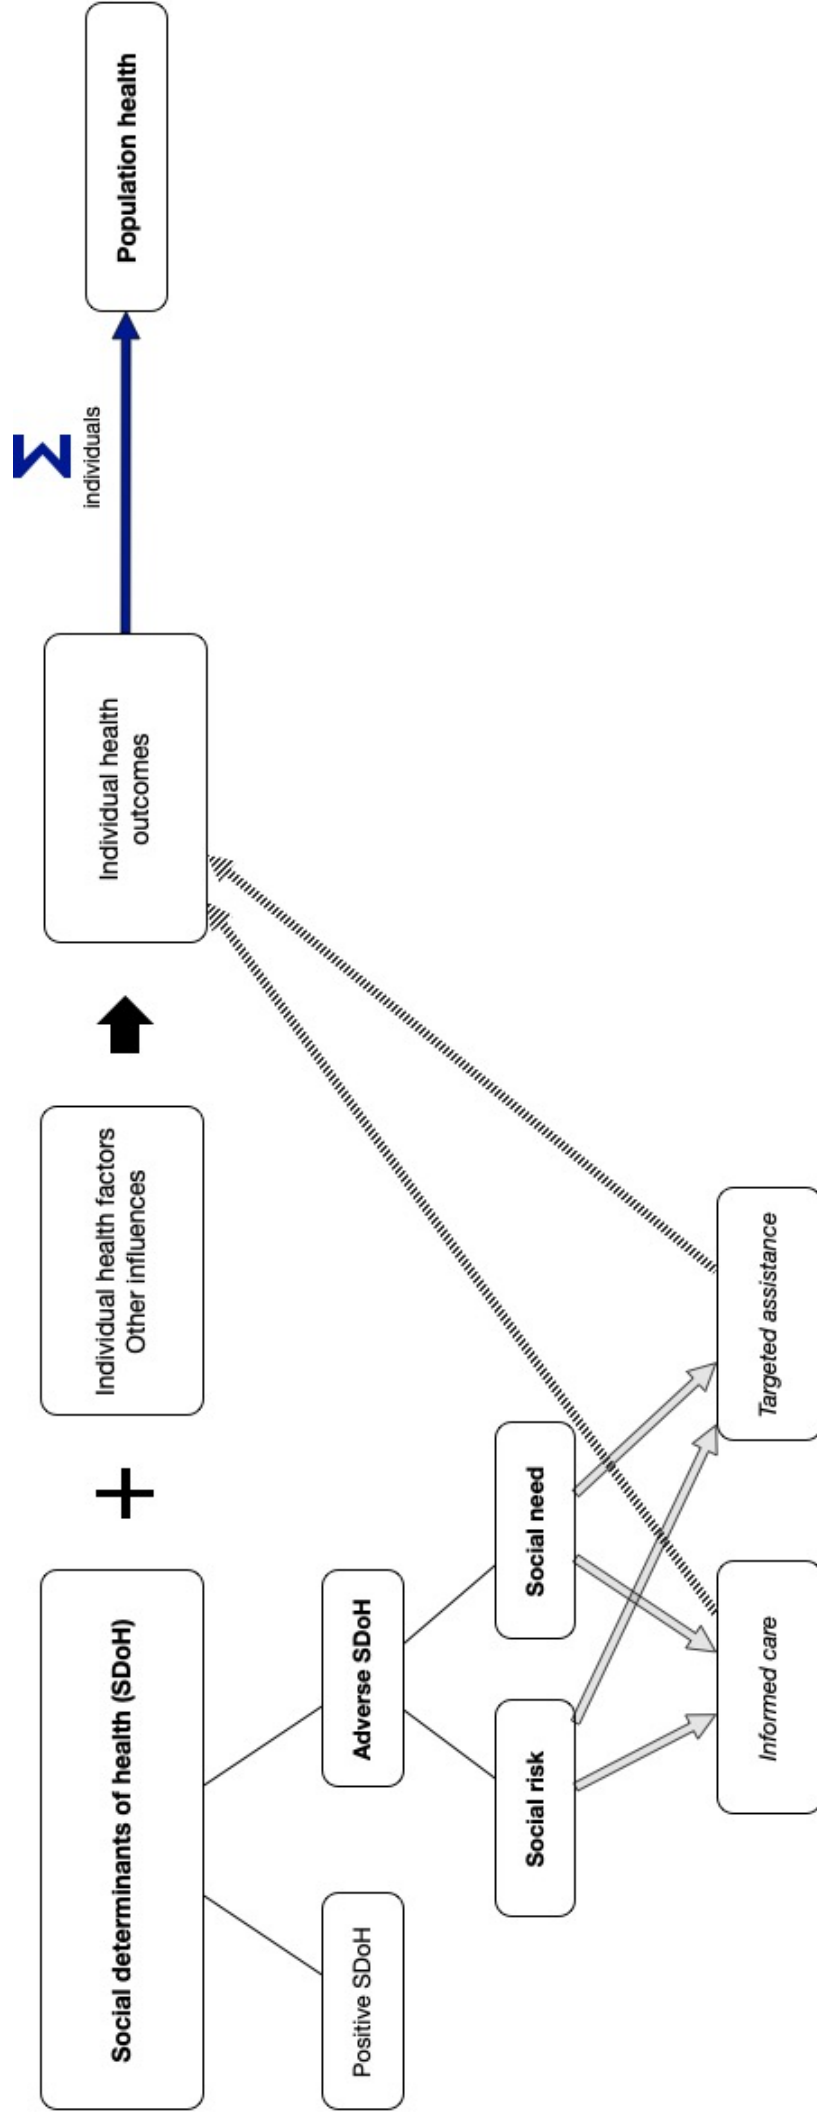

Supplement: EMP2-1-852-s005.pdf [file EMP2-1-852-s005.pdf]
